# Supplementary material
Source: PubMed Central journal article supplement (PMC7641203)
Supplement: 41422_2020_355_MOESM1_ESM.pdf [file 41422_2020_355_MOESM1_ESM.pdf]

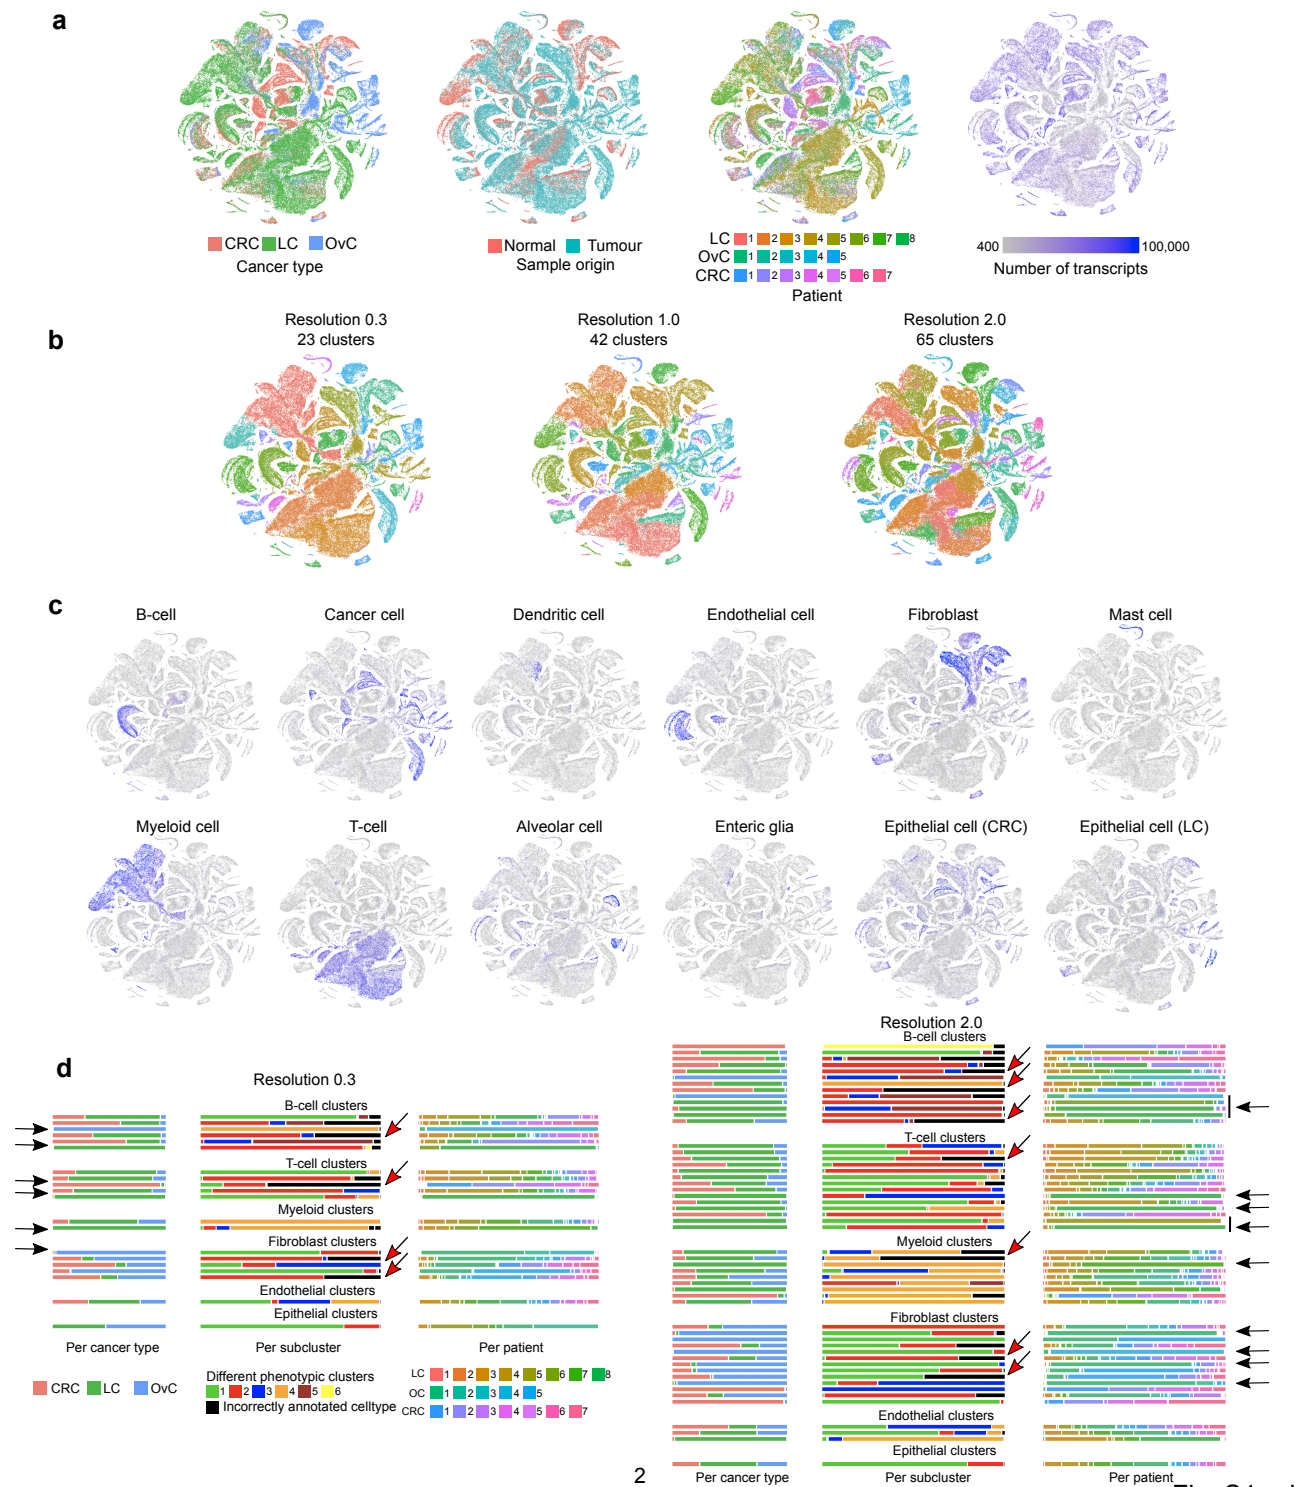

Fig. S1a-d

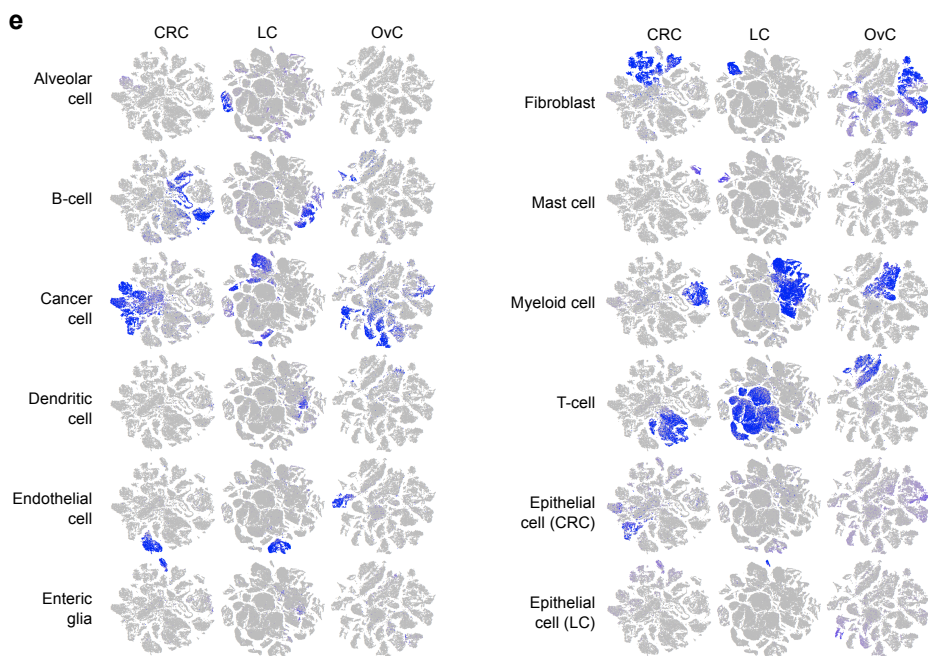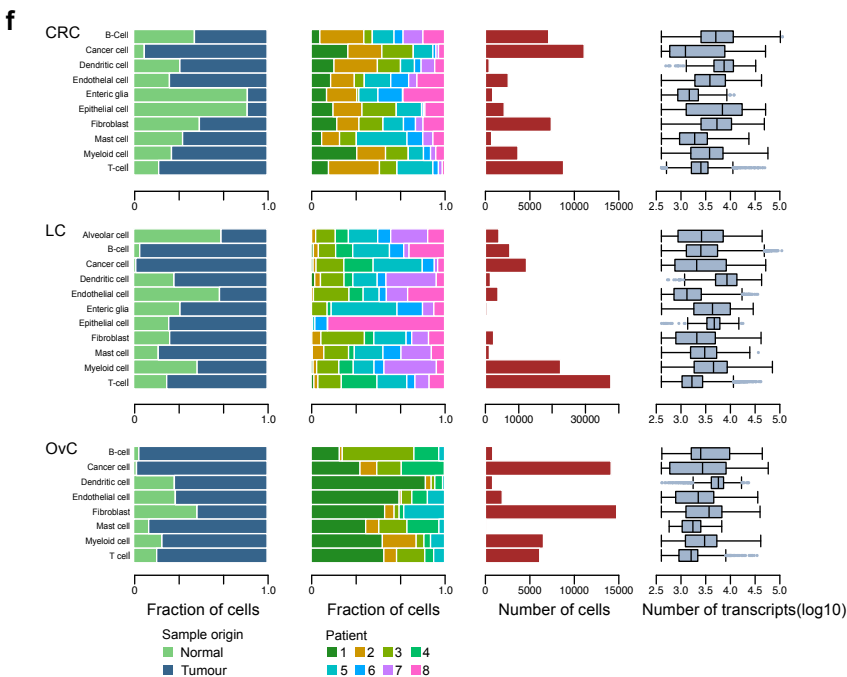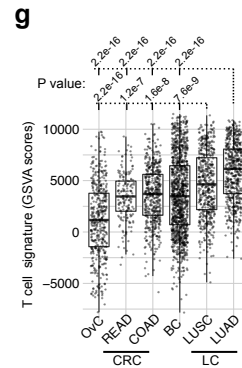

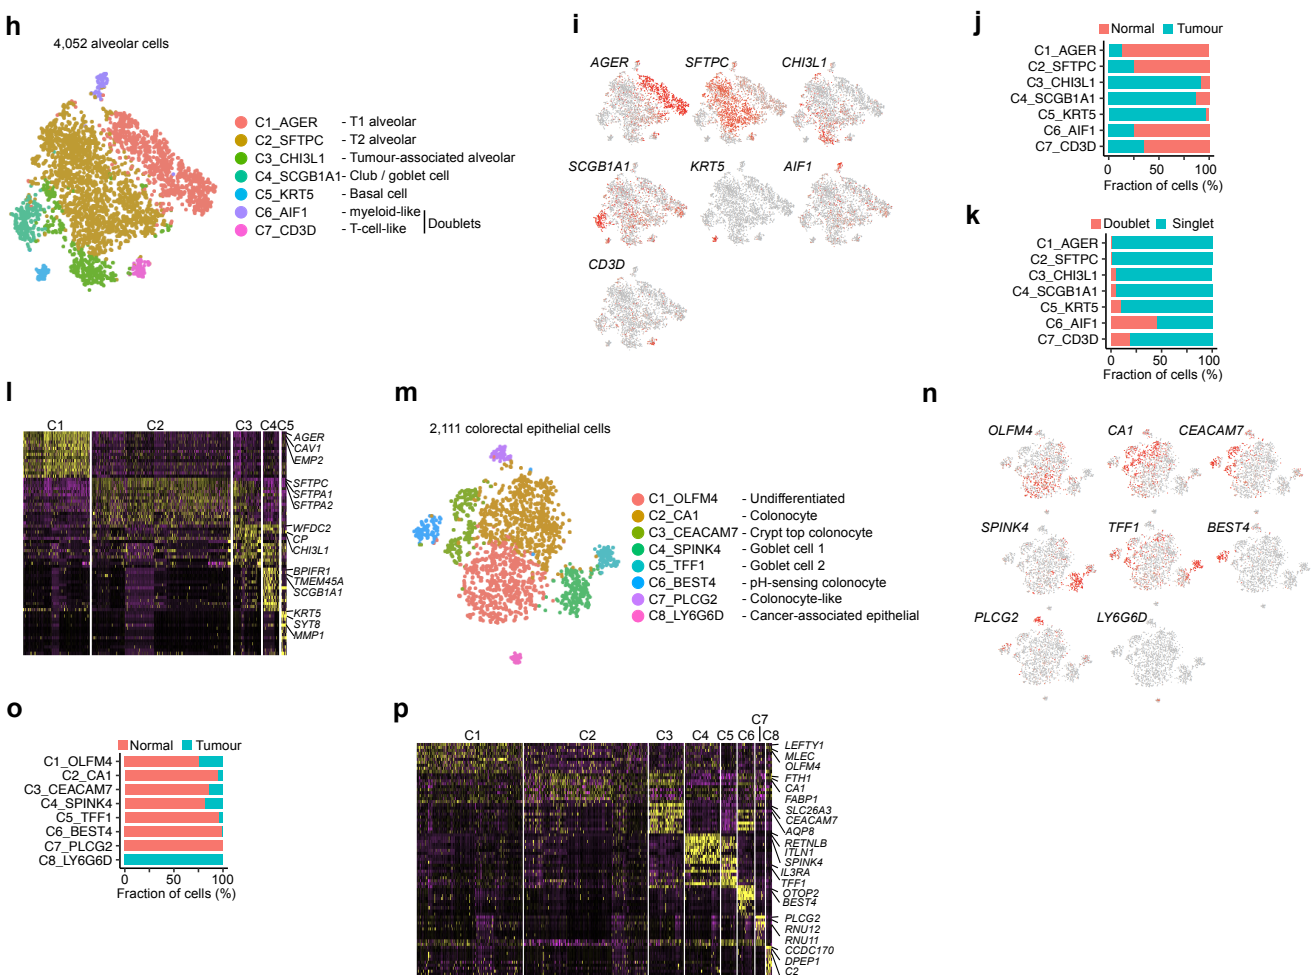

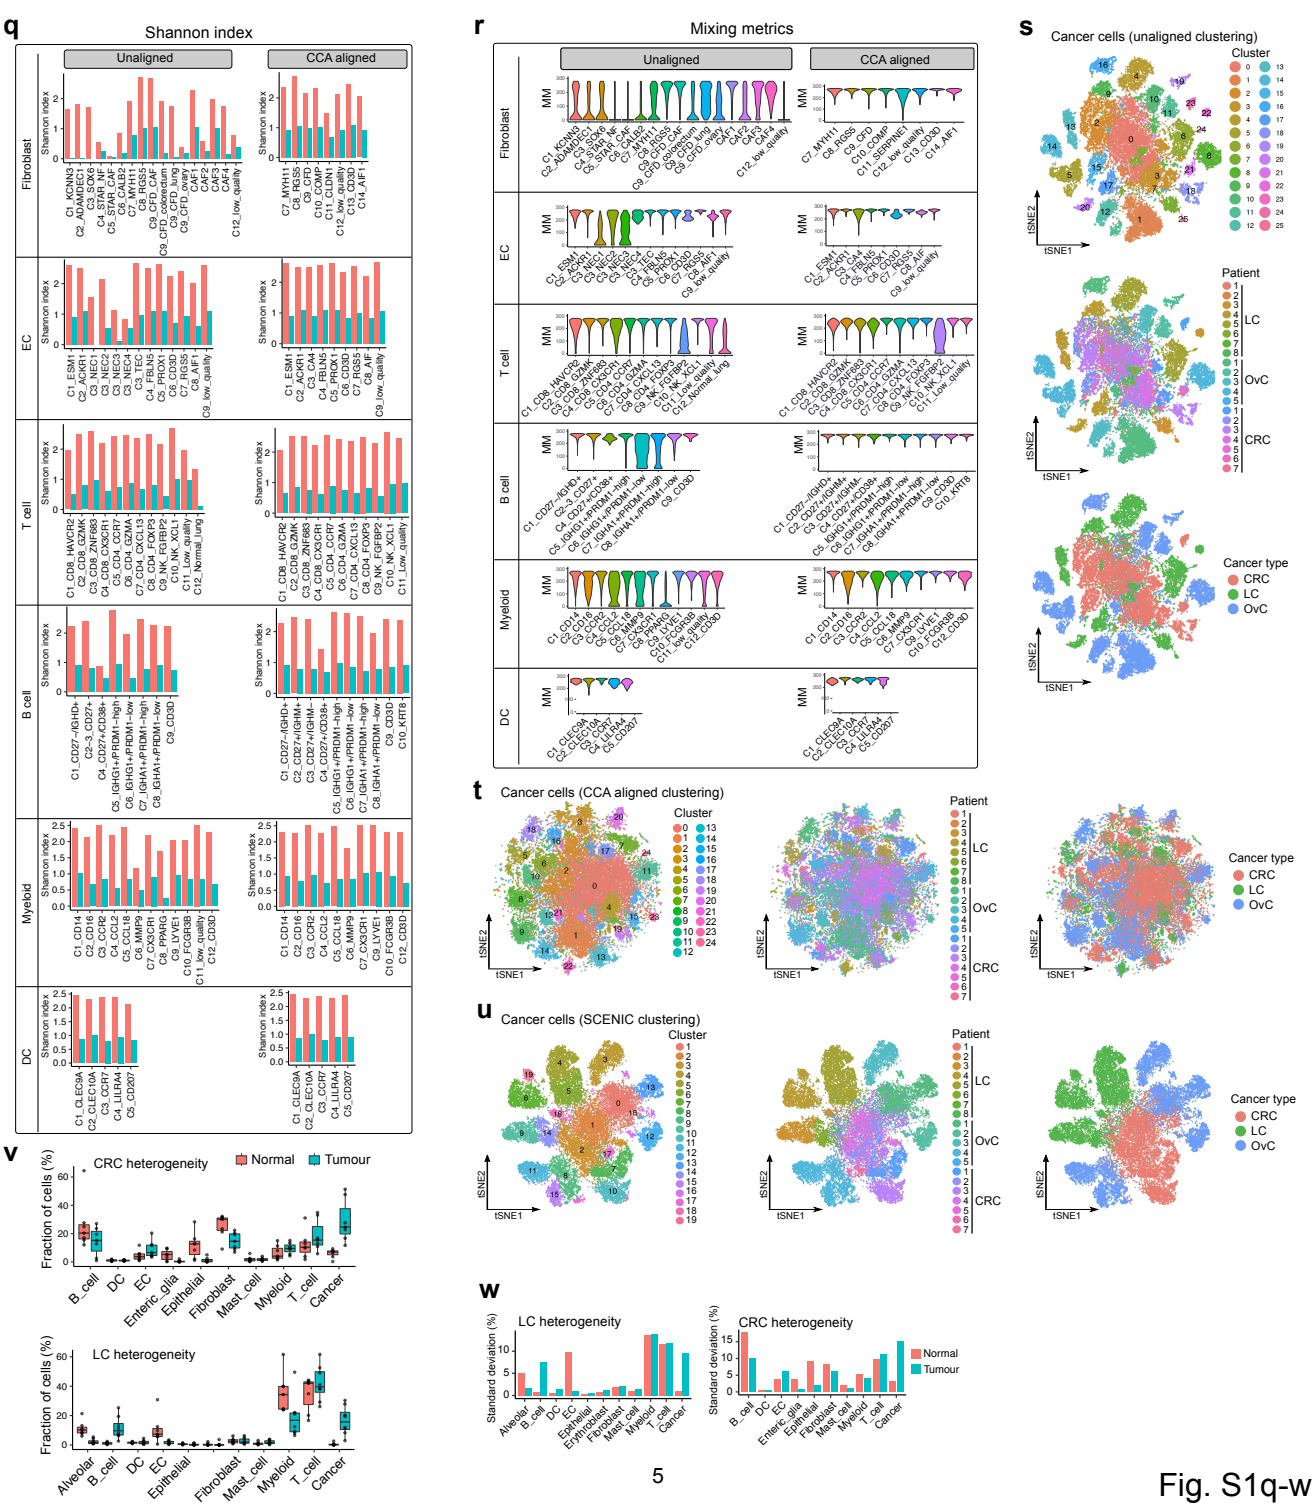



### Fig. S1. Major cell type clustering

**a** t-SNE plots of 183,376 single cells colour-coded per cancer type, sample of origin, patient, and number of transcripts. **b** t-SNE plots colour-coded by different clusters generated by PCA based clustering at different resolutions. **c** Expression of metagenes projected on t-SNE plots. Composition of the metagenes: B-cell (*CD79A*, *CD79B*), cancer (*EPCAM*, *KRT7*, *KRT18*), DC (*CD1C*, *CD207*, *CLEC9A*, *LILRA4*, *CCL17*), EC (*CLDN5*, *PECAM1*, *VWF*), fibroblast (*COL1A*, *BGN*, *DCN*), mast cell (*MS4A2*, *TPSAB1*, *CPA3*), myeloid (*CD68*, *LYZ*, *AIF1*), T-cell (*CD3D*, *CD3E*, *CD3G*), alveolar cell (*CLDN18*, *SFTPA1*, *SFTPA2*, *SFTPC*), enteric glia (*S100B*, *PLP1*), epithelial cell (colorectal, *MT1E*, *MT1G*, *ITLN1*, *ZG16*), epithelial cell (lung, *CAPS*, *TPP3*). **d** Barplots ordered per major cell type at resolutions 0.3 (left column) and 2.0 (right column). The barplots represent the composition per cancer type (left panel), the annotation per subcluster, as previously described (middle panel)<sup>2</sup> and the contribution per patient (right panel). Cancer and tissue specific clusters (alveolar) are excluded. At the lower resolution arrows indicate the tissue specific clusters (black arrows), at the higher resolution arrows indicate patient specific clusters (black arrows). Cells clustered into an incorrect major cell type are highlighted by red arrows at both resolutions. **e** Expression of metagenes projected on t-SNE plots per cancer type. Same metagenes were used as in (c). **f** Barplots representing per cell type in different cancers from left to right: fraction of cells per origin, fraction of cells per patient, number of cells, and the total number of detected transcripts. **g** Boxplot showing the prevalence of T-cells based on GSVA scores in bulk RNA-seq of different TCGA cancer types, including LC (both for LUAD and LUSC with 541 and 502 patients respectively), BC (1,119 patients), CRC (rectal cancer or READ and colorectal cancer or COAD with 167 and 483 patients respectively) and OvC (430 patients). *P*-values for LUAD and LUSC versus all other cancer types are depicted. **h** t-SNE plot showing 4,052 alveolar cells colour-coded by clusters. **i** t-SNE plots showing marker gene expressions of alveolar clusters. **j** Fraction of cells derived from normal (red) or tumour tissue (green) for each alveolar cluster. **k** Fraction of singlet and doublet cells in each alveolar cluster calculated by DoubletFinder. C6 and C7 have higher doublet percentage than other clusters. **l** Heatmap for differential gene expression of alveolar clusters. **m** t-SNE plot showing 2,111 colorectal epithelial cells colour-coded by clusters. **n** t-SNE plots showing marker gene expressions of colorectal epithelial cell clusters. **o** Fraction of cells derived from normal

(red) or tumour tissue (green) for each colorectal epithelial cluster. **p** Heatmap for differential gene expression of colorectal epithelial cell clusters. **q-r** Shannon index (**q**) and mixing metrics (**r**) in all cell type subclusters after unaligned and CCA-aligned clustering; Red and green denotes the Shannon index for patient and cancer type, respectively. **s-u** t-SNEs of cancer cells colour-coded for each separate cluster (left), per individual patient (middle) and cancer type (right) by unaligned clustering (**s**), CCA aligned clustering (**t**) and SCENIC clustering that leveraging transcription factor activity calculated by SCENIC pipeline (**u**). **v** Boxplots showing the relative percentage of cancer cells and each stromal subcluster derived from normal (red) or tumour (green) in CRC and LC, respectively. **w** Standard deviation of the relative percentage of cancer cells and each stromal subcluster in normal and tumour tissue in CRC and LC, respectively. The standard deviation was considered a measure of inter-tumour heterogeneity.
