# Supplementary material
Source: PubMed Central journal article supplement (PMC7641203)
Supplement: 41422_2020_355_MOESM3_ESM.pdf [file 41422_2020_355_MOESM3_ESM.pdf]

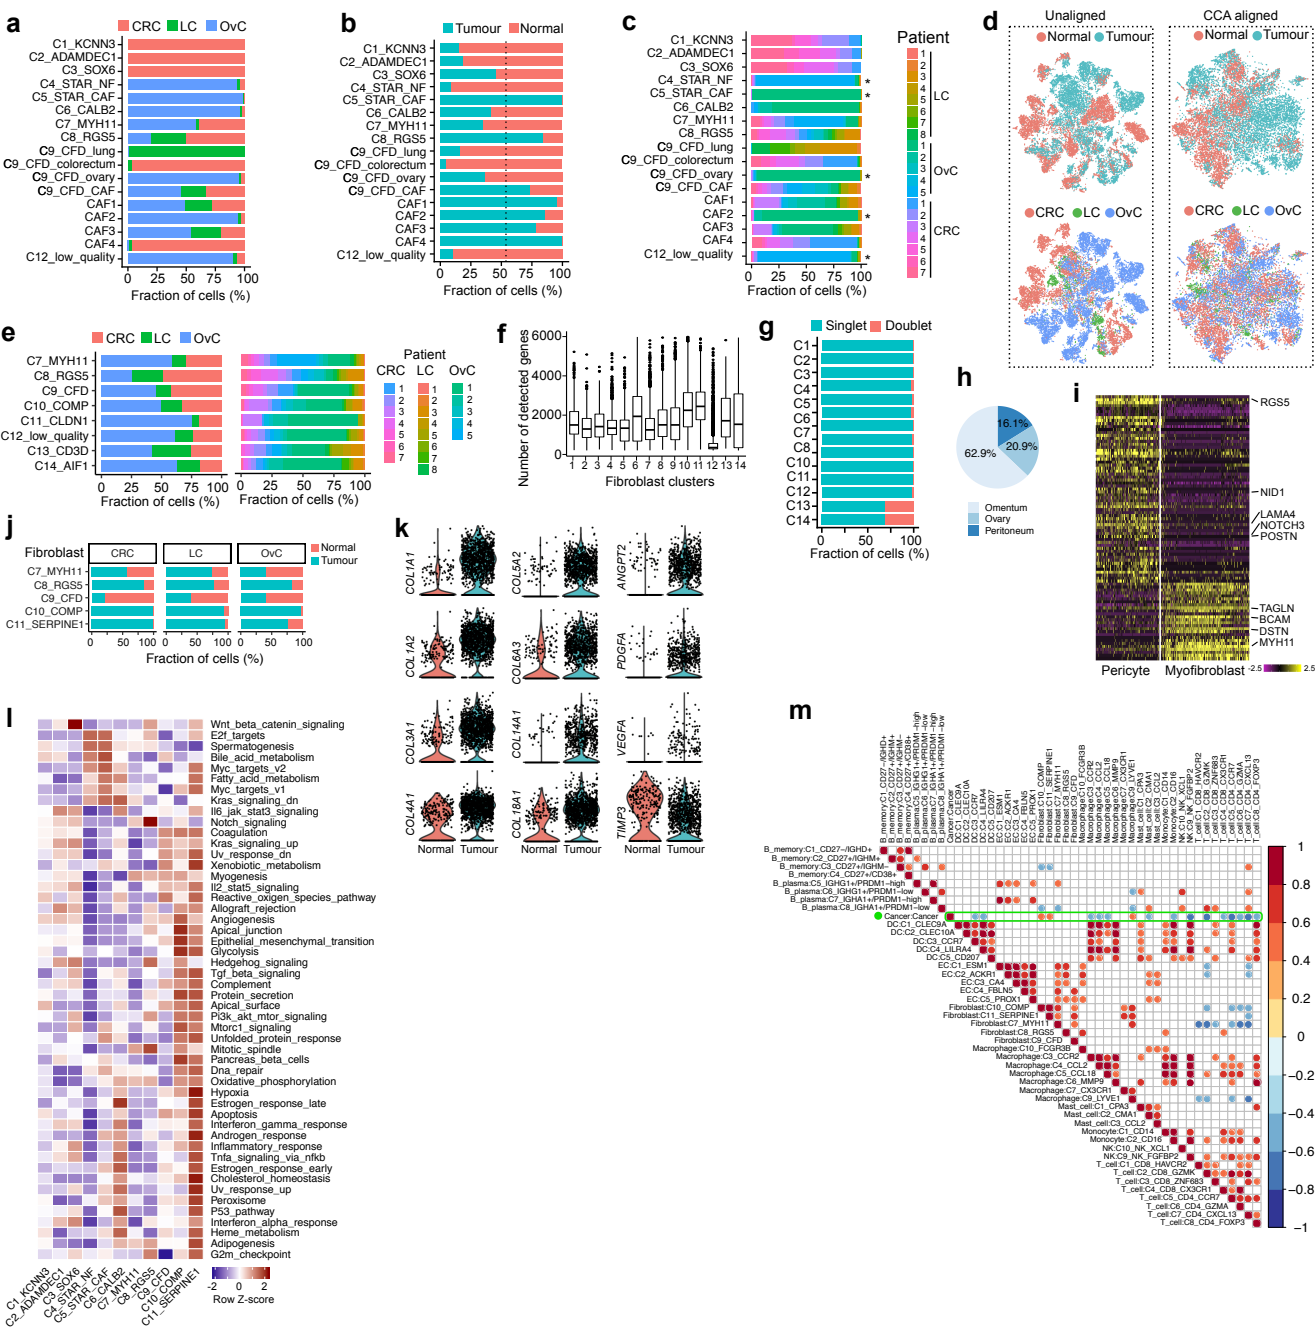

### **Fig. S3. Characterization of fibroblasts**

**a-c** Fraction of cells in the unaligned fibroblast clusters colour-coded per cancer type (**a**), sample origin (**b**), or patient (**c**). **d** t-SNE plots showing unaligned and CCA aligned clusters colour-coded by sample origin (upper panels) and cancer type (low panels). **e** Fraction of cells in CCA-aligned fibroblast subclusters colour-coded per cancer type (left) or patient (right). **f** Number of detected genes for fibroblast clusters, combining both tissue-specific and shared subclusters. **g** Fraction of singlet and doublet cells detected for fibroblast clusters. **h** Fraction of mesothelium-derived cells from different tissues. **i** Heatmap of differentially expressed genes between pericytes and myofibroblasts. **j** Fraction of cells derived from normal (red) or tumour tissue (green) for shared fibroblast subclusters in each cancer type. **k** Violin plot showing differentially expressed genes from normal and tumour tissues. **l** Differences in cancer-hallmark pathway activities scored per cell by AUCell for fibroblast clusters. **m** Heatmap showing positive (red) and negative (blue) correlations between the prevalence of the different cell phenotypes in each patient. Only significant correlations ( $p < 0.05$ ), as assessed by Pearson correlation, are shown. Positive correlations between cancer cells and CAFs (C10, C11) were detected.
