# Supplementary material
Source: PubMed Central journal article supplement (PMC7641203)
Supplement: 41422_2020_355_MOESM5_ESM.pdf [file 41422_2020_355_MOESM5_ESM.pdf]

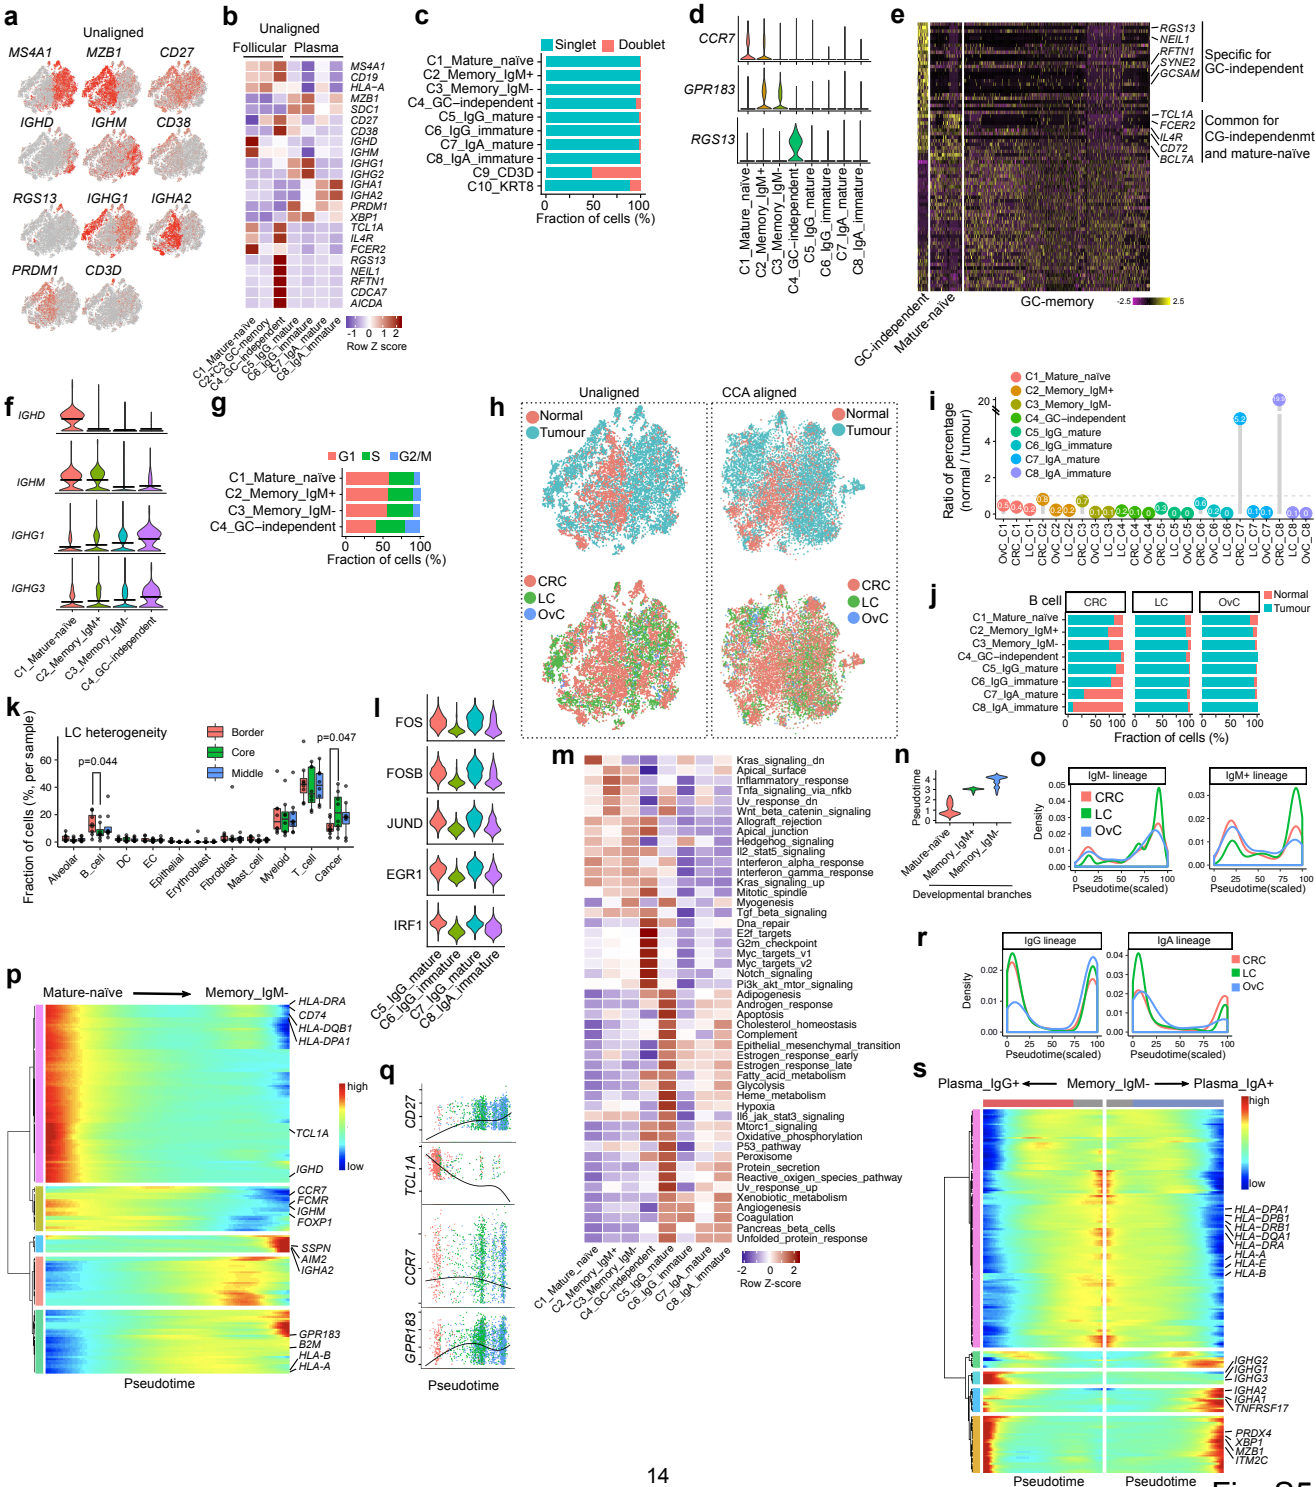

### **Fig. S5. Delineation of B-cell taxonomy**

**a** t-SNE plots showing marker gene expressions for unaligned clusters. **b** Heatmap of functional gene sets for unaligned clusters. **c** Fraction of singlet and doublet cells predicted by DoubletFinder. **d** Violin plot showing expressions of GC-migration related genes. **e** Heatmap of differentially expressed genes between follicular B-cell subclusters. **f** Differentially expressed immunoglobulin genes between follicular B-cell subclusters, mean expression indicated as horizontal bars. **g** Fraction of cells for follicular B-cell subclusters with predicted cell cycle phases. **h** t-SNE plots for unaligned (left panels) and CCA-aligned (right panels) methods colour-coded by sample origin (upper panels), or cancer type (lower panels). **i** Ratio of relative % for B-cell subclusters by comparing normal with tumour tissues, <1 indicates tumour enrichment. Most B-cells (C1-C6) were enriched in tumour (FDR <  $5.2 \times 10^{-8}$ ), while IgA<sup>+</sup> plasma cells (C7-C8) were enriched in normal colon (FDR <  $8.9 \times 10^{-118}$ ). **j** Fraction of cells derived from normal (red) or tumour tissue (green) for each B-cell subcluster in each cancer type. **k** Boxplot showing the prevalence of each cell type stratified for tissue taken from the border, middle or core tumour region in LC. P-values < 0.05 comparing border versus core regions are shown. **l** Violin plot showing transcription factor activities (AUC score) calculated by SCENIC for plasma cell subclusters. **m** Differences in cancer hallmark pathway activities scored per cell by AUCell for B-cell clusters. **n** Violin plot showing pseudotime distribution of different branches indicated in Fig. 5g. **o** Density plots for CRC, LC and OvC along the trajectories of B memory cells of the IgM<sup>+</sup> and IgM<sup>-</sup> lineages. **p** Heatmap of expression dynamics of differentially expressed genes along the pseudotime from mature-naïve to class-switched memory B-cell (IgM<sup>-</sup>). **q** Marker gene dynamics along the pseudotime from mature-naïve to class-switched memory B-cells (IgM<sup>-</sup>) colour-coded as in Fig. 5g. **r** Density plots for CRC, LC and OvC along the differentiation trajectories of IgM<sup>-</sup> to plasma cells (both the IgG<sup>+</sup> and IgA<sup>+</sup> lineages are shown). **s** Heatmap of expression dynamics of differentially expressed genes along the pseudotime from IgM<sup>-</sup> memory B-cells to IgG<sup>+</sup> or IgA<sup>+</sup> plasma cells.
