# Supplementary material
Source: PubMed Central journal article supplement (PMC7641203)
Supplement: 41422_2020_355_MOESM6_ESM.pdf [file 41422_2020_355_MOESM6_ESM.pdf]

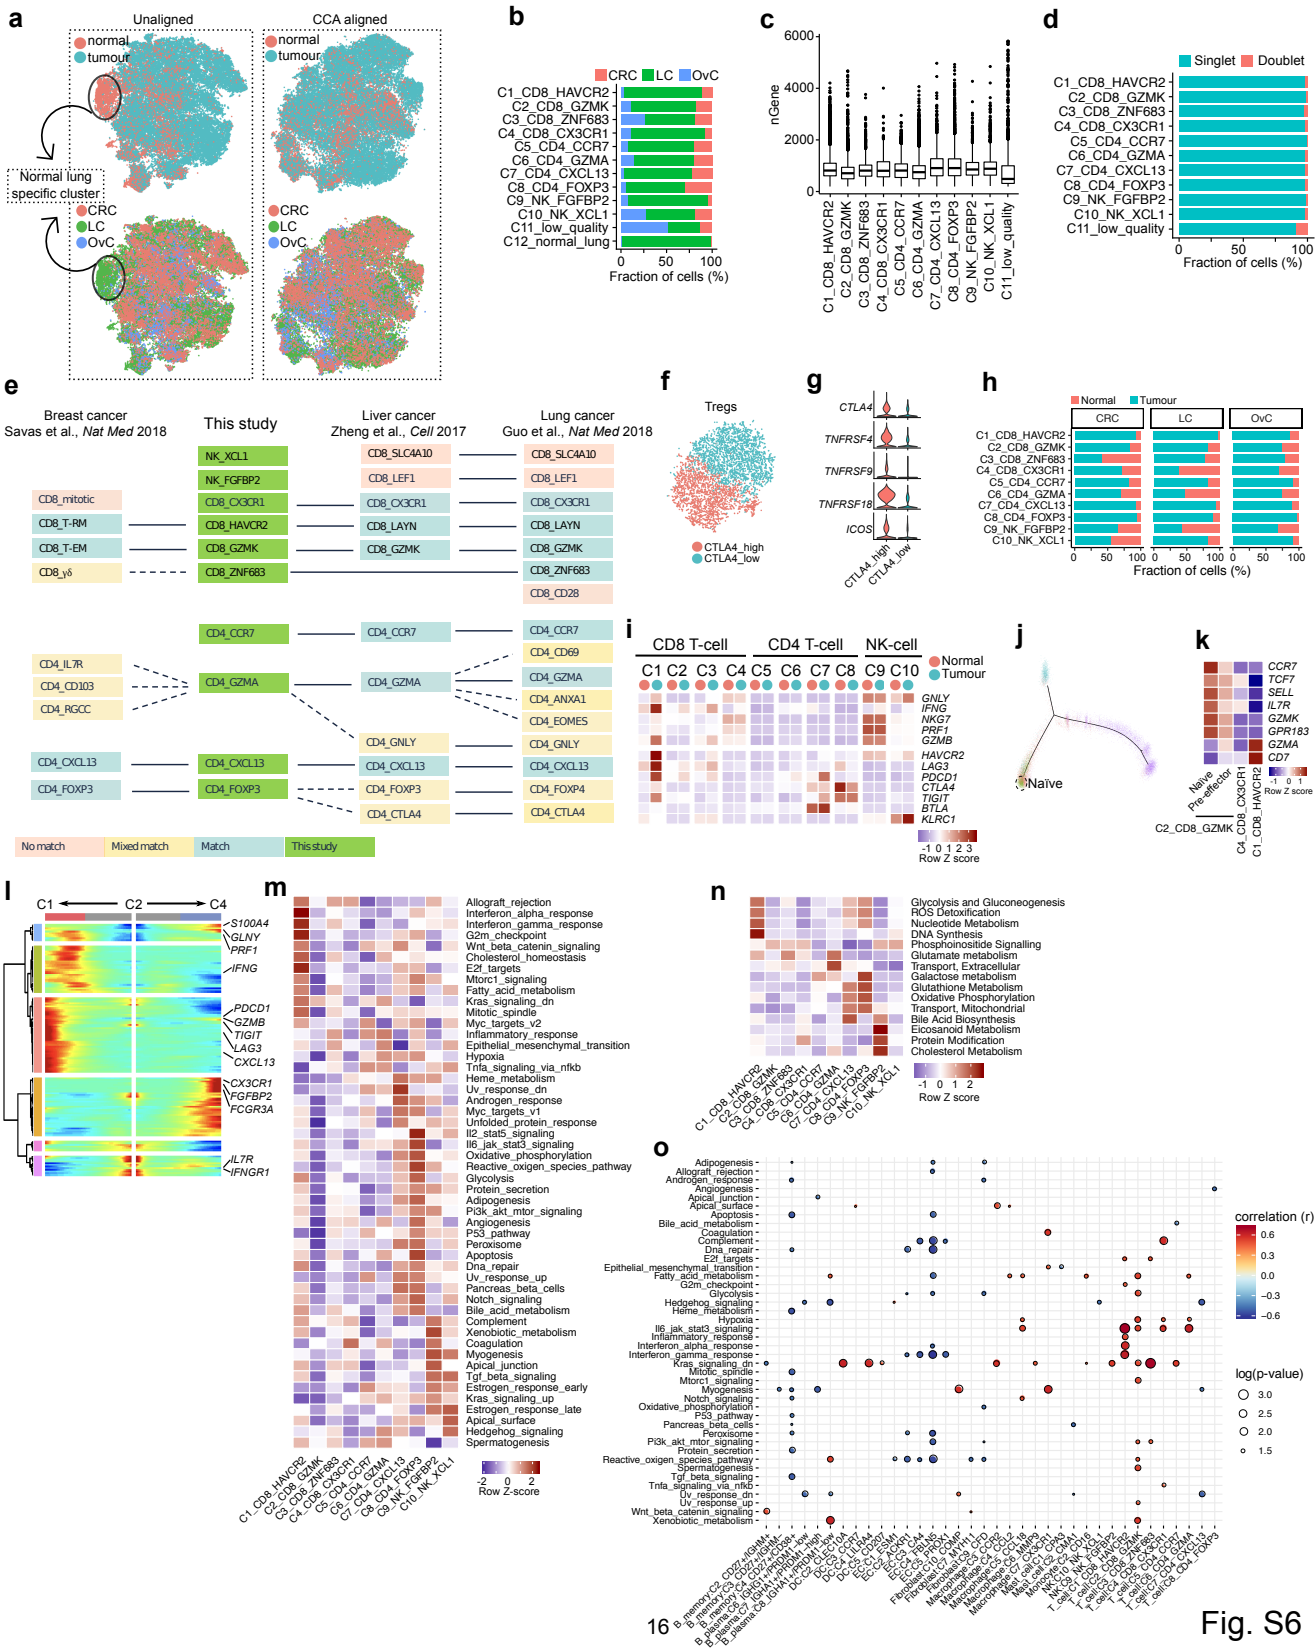

Fig. S6

### Fig. S6. Profiling of T- and NK-cells

**a** t-SNE plots showing unaligned (left panels) or CCA-aligned (right panels) clusters colour-coded by sample origin (upper panels), or cancer type (lower panels). Normal lung specific cluster are indicated by circles and arrows. **b** Fraction of cells for T-/NK-cell subclusters (unaligned) from different cancer types. **c** Number of genes detected from different T-cell subclusters (CCA aligned). **d** Fraction of singlet and doublet cells for T-/NK- cell subclusters predicted by DoubletFinder. **e** Comparison of T-/NK-cell subclusters defined in this pan-cancer study and previous breast, liver and lung cancer studies<sup>52,54,55</sup>. **f** t-SNE plot showing subclusters within CD4\_FOXP3 Tregs after further subclustering. **g** Violin plot showing marker gene expressions between two Tregs subclusters. **h** Fraction of cells derived from normal (red) or tumour tissue (green) for each T-/NK-cell subcluster in each cancer type. **i** Heatmap of differentially expressed genes for T-/NK-cell subclusters with different sample origins. **j** Trajectories of CD8<sup>+</sup> T-cell differentiation. Naïve cells are located at the root of the C2\_CD8\_GMZK branch (dash line circled). **k** Heatmap of naïve marker gene expression. The naïve subcluster within the C2\_CD8\_GZMK cluster, as circled in **j**, expresses a number of naïve markers, including *CCR7* and *TCF7*. **l** Heatmap of expression dynamics of differentially expressed genes along the pseudotime of the 2 CD8<sup>+</sup> lineages (from C2\_CD8\_GZMK to C1\_CD8\_HAVCR1 or C4\_CD8\_CX3CR1). **m** Differences in cancer hallmark pathway activities scored per cell by AUCell for T-/NK-cell subclusters. **n** Metabolic activity of each T-/NK-cell phenotype scored by AUCell. **o** Heatmap showing positive (red) and negative (blue) correlations between cancer hallmark pathway activation in cancer cells (Y-axis) and the prevalence of the stromal cell phenotypes.
