# Supplementary material
Source: PubMed Central journal article supplement (PMC7641203)
Supplement: 41422_2020_355_MOESM11_ESM.pdf [file 41422_2020_355_MOESM11_ESM.pdf]

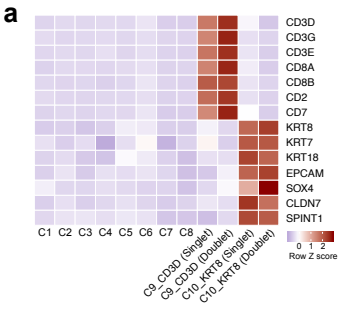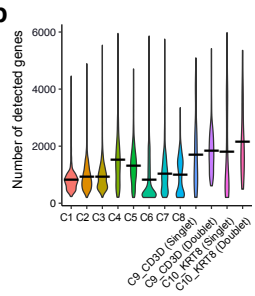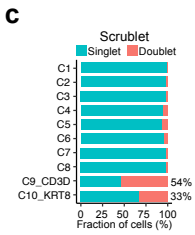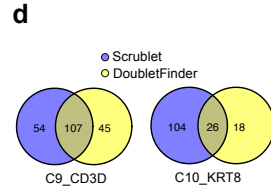

Fig. S11

**Fig. S11. Doublet cluster prediction for B-cell subclusters**

**a** Heatmap of B-cell clusters (C1 to C10) showing the expression of T-cell and cancer cell marker genes. Clusters C9 and C10 were further divided for singlet or doublet subclusters as predicted by DoubletFinder, and cells in these subclusters expressed similarly high levels of T-cell and cancer cell marker genes, respectively. **b** Number of genes detected in the B-cell clusters. The C9 and C10 clusters were further divided for singlet or doublet subclusters as predicted by DoubletFinder. These subclusters had a similarly high level of detected genes as compared to C1-C8 clusters. **c** Percentage of doublets predicted by Scrublet. The C9 and C10 clusters have a higher percentage of doublet cells as compared to C1-C8 clusters, in consistence with the DoubletFinder results. **d** Overlap in cells predicted to be doublets by DoubletFinder and Scrublet, both for cells in the C9 and C10 clusters. This revealed that both tools often identified different cells to represent doublets, supporting the concept that all cells within these clusters should be considered doublet cells.
