# Supplementary material
Source: PubMed Central journal article supplement (PMC7641203)
Supplement: 41422_2020_355_MOESM12_ESM.pdf [file 41422_2020_355_MOESM12_ESM.pdf]

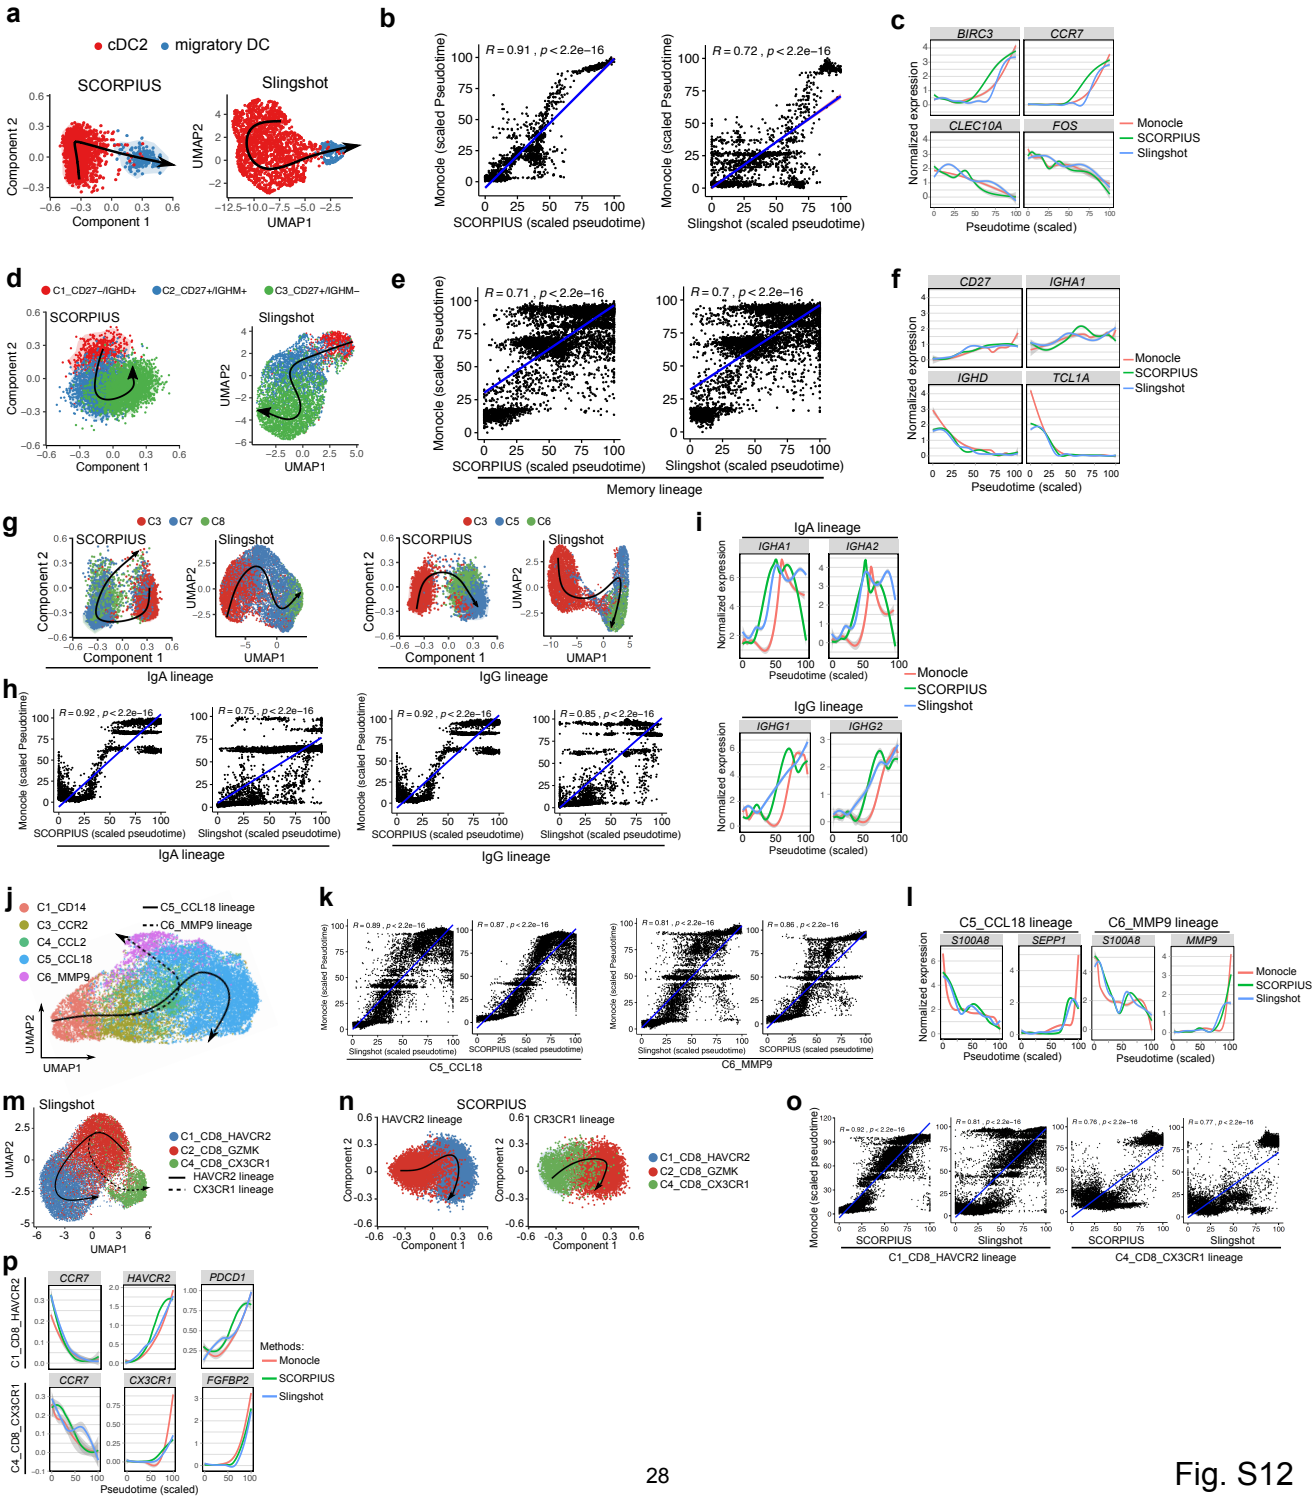

**Fig. S12. Validation of trajectory inference results using Monocle, SCORPIUS and Slingshot**

**a** Trajectories of cDC2 to migratory DC differentiation by SCORPIUS and Slingshot. **b** Correlation between cells ordered along their pseudotime using Monocle versus those ordered by SCORPIUS and Slingshot, respectively. **c** Expression of marker genes *BIRC3*, *CCR7*, *CLEC10A* and *FOS* along the DC lineage. **d** Trajectories of memory B-cells by SCORPIUS and Slingshot. **e** Correlation between cells ordered along their pseudotime using Monocle versus those ordered by SCORPIUS and Slingshot. **f** Expression of marker genes *CD27*, *IGHA1*, *IGHD* and *TCL1A* along the memory B-cell lineage. **g** Trajectories of plasma cell differentiation by SCORPIUS and Slingshot. **h** Correlation between cells ordered along their pseudotime using Monocle versus those ordered by SCORPIUS and Slingshot. **i** Expression of marker genes along the pseudotime of the IgA lineage (*IGHA1*, *IGHA2*) and IgG lineage (*IGHG1*, *IGHG2*). **j** Branched trajectories of myeloid cells by Slingshot. Trajectories are separated for the CCL18 and MMP9 lineage. **k** Correlation between cells ordered along their pseudotime using Monocle versus those ordered by SCORPIUS and Slingshot, respectively. **l** Expression of marker genes along the C5\_CCL18 lineage and C6\_MMP9 per method. **m-n** Trajectories of CD8+ T-cells generated by Slingshot(**m**) and SCORPIUS(**n**). As SCORPIUS cannot handle branched trajectories, the HAVCR2 and CX3CR1 lineage were analysed separately with SCORPIUS. **o** Correlation between cells ordered along their pseudotime using Monocle versus those ordered using Slingshot and SCORPIUS, respectively, for the HAVCR2 (C1\_CD8\_HAVCR2) lineage and the CX3CR1 (C4\_CD8\_CX3CR1) lineage. **p** Expression of marker genes *CCR7*, *HAVCR2*, *PDCD1* along the HAVCR2 lineage and of *CCR7*, *CX3CR1* and *FGFBP2* along the CX3CR1 lineage.
