# Supplementary material
Source: PubMed Central journal article supplement (PMC7641203)
Supplement: 41422_2020_355_MOESM13_ESM.pdf [file 41422_2020_355_MOESM13_ESM.pdf]

| Patient number | Tumor type | Gender | Age range (years) | Stage | TNM classification | Pathological subtype                                                                                                          | Molecular status |
|----------------|------------|--------|-------------------|-------|--------------------|-------------------------------------------------------------------------------------------------------------------------------|------------------|
| LC_1           | LC         | Female | 70-75             | IIA   | pT2bNOM0           | Squamous cell carcinoma                                                                                                       |                  |
| LC_2           | LC         | Male   | 86-90             | IB    | pT2bNOM0           | Squamous cell carcinoma                                                                                                       |                  |
| LC_3           | LC         | Male   | 66-70             | IIIB  | pT4N2M0            | Adenocarcinoma                                                                                                                |                  |
| LC_4           | LC         | Female | 60-65             | IIB   | pT2aN1M0           | Adenocarcinoma                                                                                                                |                  |
| LC_5           | LC         | Male   | 60-65             | IA3   | pT1cNOM0           | Large cell carcinoma                                                                                                          |                  |
| LC_6           | LC         | Male   | 60-65             | IIIA  | pT4N1M0            | Adenocarcinoma                                                                                                                |                  |
| LC_7           | LC         | Male   | 60-65             | IB    | pT2aNOM0           | Squamous cell carcinoma                                                                                                       |                  |
| LC_8           | LC         | Female | 50-55             | IIB   | pT3NOM0            | Pleiomorphic carcinoma                                                                                                        |                  |
| OvC_1          | OvC        | Female | 70-75             | IIIC  | pT3cNxM0           | High grade serous carcinoma                                                                                                   |                  |
| OvC_2          | OvC        | Female | 50-55             | IVB   | pT3cNxM1b          | High grade serous carcinoma                                                                                                   |                  |
| OvC_3          | OvC        | Female | 60-65             | IVB   | pT3cNxM1b          | High grade serous carcinoma                                                                                                   | BRCA+            |
| OvC_4          | OvC        | Female | 80-85             | IVB   | pT3cNxM1b          | High grade serous + clear cell carcinoma (mix)                                                                                |                  |
| OvC_5          | OvC        | Female | 60-65             | IA    | pT1cNOM0           | High grade serous carcinoma                                                                                                   |                  |
| CRC_1          | CRC        | Female | 80-85             | IIB   | pT4aNOM0           | Right caecum, global moderately differentiated adenocarcinoma with mixed glandular, mucinous growth pattern, moderate budding | MSI-high         |
| CRC_2          | CRC        | Female | 86-90             | IIIB  | pT3N1bM0           | Left rectosigmoid, moderately differentiated adenocarcinoma NST                                                               | MSS              |
| CRC_3          | CRC        | Female | 50-55             | IVA   | pT4aN1aM1a         | Left sigmoid, moderately differentiated adenocarcinoma                                                                        | MSS              |
| CRC_4          | CRC        | Male   | 80-85             | I     | pT2NOM0            | Left sigmoid, moderately differentiated adenocarcinoma                                                                        | MSS              |
| CRC_5          | CRC        | Male   | 50-55             | IIA   | pT3NOL1            | Left sigmoid, moderately differentiated adenocarcinoma                                                                        | MSS              |
| CRC_6          | CRC        | Female | 76-80             | IIIB  | pT3N1aM0           | Right caecum, moderately differentiated adenocarcinoma NOS                                                                    | MSS              |
| CRC_7          | CRC        | Male   | 80-85             | IIA   | pT3NOL1            | Right ascending, moderately differentiated adenocarcinoma                                                                     | MSS              |
| BC_1           | BC         | Female | 40-45             | III   | pT1cNOM0           | Invasive ductal carcinoma                                                                                                     | HER2 positive    |
| BC_2           | BC         | Female | 50-55             | III   | pT2NOM0            | Invasive ductal carcinoma                                                                                                     | Triple negative  |
| BC_3           | BC         | Female | 50-55             | III   | pT3NOM0            | Invasive ductal carcinoma                                                                                                     | Triple negative  |
| BC_4           | BC         | Female | 86-90             | III   | pT1NOM0            | Invasive ductal carcinoma                                                                                                     | Triple negative  |
| BC_5           | BC         | Female | 60-65             | III   | pT2N1aM0           | Invasive apocrine carcinoma                                                                                                   | Triple negative  |
| BC_6           | BC         | Female | 70-75             | III   | pT2NOM0            | Invasive ductal carcinoma                                                                                                     | HER2 positive    |
| BC_7           | BC         | Female | 80-85             | III   | pT3NOM0            | Metaplastic carcinoma                                                                                                         | Triple negative  |
| BC_8           | BC         | Female | 60-65             | III   | pT3NOM0            | Invasive ductal carcinoma                                                                                                     | HER2 positive    |
| BC_9           | BC         | Female | 40-45             | III   | pT2N1M0            | Invasive ductal carcinoma                                                                                                     | Luminal-HER2+    |
| BC_10          | BC         | Female | 50-55             | III   | pT2NOM0            | Invasive ductal carcinoma                                                                                                     | Triple negative  |
| BC_11          | BC         | Female | 46-50             | III   | pT1cNOM0           | Invasive ductal carcinoma                                                                                                     | Triple negative  |
| BC_12          | BC         | Female | 76-80             | III   | pT2NxM0            | Invasive ductal carcinoma                                                                                                     | Triple negative  |
| BC_13          | BC         | Female | 60-65             | III   | pT2N1M0            | Invasive ductal carcinoma                                                                                                     | Luminal B-like   |
| BC_14          | BC         | Female | 46-50             | II    | pT2N1M0            | Invasive ductal carcinoma                                                                                                     | Luminal A-like   |
| BC_15          | BC         | Female | 66-70             | III   | pT1NOM0            | Invasive ductal carcinoma                                                                                                     | Triple negative  |
| BC_16          | BC         | Female | 60-65             | III   | pT2N1M0            | Invasive ductal carcinoma                                                                                                     | Luminal B –like  |

**Supplementary Table S1:** Characteristics of the patients included in this study. Included cancer types are lung cancer (LC), ovarian cancer (OvC), colorectal cancer (CRC) and breast cancer (BC). Microsatellite Instable (MSI), microsatellite stable (MSS), Human epidermal growth factor receptor 2 (HER2). Please see Table S3 for tumour mutation signatures.
