# Supplementary material
Source: PubMed Central journal article supplement (PMC7641203)
Supplement: 41422_2020_355_MOESM14_ESM.pdf [file 41422_2020_355_MOESM14_ESM.pdf]

| Patient number | Cancer type | 10X version | Cells | Sample type | Tumour site | UMIs       | Saturation (%) | Reads       |
|----------------|-------------|-------------|-------|-------------|-------------|------------|----------------|-------------|
| LC_1           | LC          | 3' V1       | 175   | Tumour      | Core        | 799,729    | 97.0           | 52,617,854  |
| LC_1           | LC          | 3' V1       | 251   | Tumour      | Core        | 1,268,737  | 96.6           | 67,690,218  |
| LC_1           | LC          | 3' V1       | 98    | Tumour      | Middle      | 616,179    | 98.1           | 80,569,121  |
| LC_1           | LC          | 3' V1       | 302   | Tumour      | Middle      | 1,489,983  | 95.9           | 70,372,636  |
| LC_1           | LC          | 3' V1       | 294   | Tumour      | Border      | 1,343,488  | 96.2           | 62,162,902  |
| LC_1           | LC          | 3' V1       | 353   | Tumour      | Border      | 1,657,136  | 95.7           | 62,589,463  |
| LC_2           | LC          | 3' V1       | 630   | Tumour      | Middle      | 3,000,702  | 93.2           | 72,138,927  |
| LC_2           | LC          | 3' V1       | 31    | Tumour      | Middle      | 197,373    | 99.1           | 62,127,483  |
| LC_2           | LC          | 3' V1       | 122   | Tumour      | Border      | 808,401    | 97.4           | 55,884,196  |
| LC_2           | LC          | 3' V1       | 356   | Normal      | na          | 1,448,126  | 96.9           | 86,230,103  |
| LC_2           | LC          | 3' V1       | 1,541 | Tumour      | Border      | 5,726,992  | 91.7           | 106,961,758 |
| LC_2           | LC          | 3' V1       | 119   | Tumour      | Core        | 600,577    | 98.1           | 58,982,416  |
| LC_3           | LC          | 3' V2       | 4,123 | Tumour      | Border      | 10,382,153 | 34.1           | 57,353,853  |
| LC_3           | LC          | 3' V2       | 4,379 | Tumour      | Middle      | 16,341,942 | 66.6           | 269,417,085 |
| LC_3           | LC          | 3' V2       | 3,517 | Tumour      | Core        | 16,849,364 | 82.4           | 577,327,377 |
| LC_3           | LC          | 3' V2       | 4,772 | Normal      | na          | 23,306,352 | 84.8           | 379,171,303 |
| LC_4           | LC          | 3' V2       | 3,333 | Normal      | na          | 6,237,310  | 28.0           | 28,594,502  |
| LC_4           | LC          | 3' V2       | 3,282 | Tumour      | Border      | 8,821,660  | 41.4           | 57,131,717  |
| LC_4           | LC          | 3' V2       | 5,164 | Tumour      | Middle      | 14,242,253 | 41.0           | 77,945,533  |
| LC_4           | LC          | 3' V2       | 5,493 | Tumour      | Core        | 17,827,572 | 52.3           | 151,492,569 |
| LC_5           | LC          | 3' V2       | 3,628 | Tumour      | Core        | 11,929,493 | 32.6           | 55,851,067  |
| LC_5           | LC          | 3' V2       | 5,012 | Tumour      | Outer       | 12,470,613 | 39.2           | 72,825,969  |
| LC_5           | LC          | 3' V2       | 6,124 | Tumour      | Middle      | 27,558,700 | 81.2           | 463,180,485 |
| LC_5           | LC          | 3' V2       | 6,403 | Normal      | na          | 32,418,218 | 72.1           | 261,340,951 |
| LC_6           | LC          | 3' V2       | 1,735 | Tumour      | Core        | 8,504,629  | 86.9           | 260,888,273 |
| LC_6           | LC          | 3' V2       | 1,429 | Tumour      | Middle      | 7,971,658  | 84.3           | 245,477,754 |
| LC_6           | LC          | 3' V2       | 814   | Tumour      | Border      | 3,292,751  | 92.8           | 289,816,712 |
| LC_6           | LC          | 3' V2       | 2,971 | Normal      | na          | 27,581,832 | 82.6           | 285,371,297 |
| LC_7           | LC          | 3' V2       | 2,902 | Tumour      | Core        | 18,403,635 | 74.1           | 125,811,122 |
| LC_7           | LC          | 3' V2       | 3,708 | Tumour      | Middle      | 24,084,368 | 74.1           | 159,839,357 |
| LC_7           | LC          | 3' V2       | 3,495 | Tumour      | Border      | 23,010,914 | 74.6           | 161,368,762 |
| LC_7           | LC          | 3' V2       | 6,254 | Normal      | na          | 26,569,105 | 67.2           | 132,227,825 |
| LC_8           | LC          | 3' V2       | 3,177 | Normal      | na          | 13,859,675 | 90.5           | 333,385,825 |
| LC_8           | LC          | 3' V2       | 2,455 | Tumour      | Border      | 17,989,693 | 84.6           | 330,208,745 |
| LC_8           | LC          | 3' V2       | 359   | Tumour      | Middle      | 22,717,876 | 85.7           | 333,583,084 |
| LC_8           | LC          | 3' V2       | 1,624 | Tumour      | Core        | 7,118,507  | 94.2           | 363,006,012 |
| OvC_1          | OvC         | 3' V2       | 8,623 | Normal      | Omentum     | 28,052,375 | 73.5           | 350,096,261 |
| OvC_1          | OvC         | 3' V2       | 4,348 | Normal      | Omentum     | 18,068,251 | 82.5           | 339,448,488 |
| OvC_1          | OvC         | 3' V2       | 1,432 | Tumour      | Peritoneum  | 4,355,115  | 93.9           | 250,974,825 |
| OvC_1          | OvC         | 3' V2       | 1,501 | Tumour      | Peritoneum  | 4,958,614  | 92.9           | 280,613,748 |
| OvC_1          | OvC         | 3' V2       | 6,351 | Tumour      | Ovarium     | 31,083,122 | 78.2           | 400,459,655 |
| OvC_2          | OvC         | 3' V2       | 5,151 | Tumour      | Peritoneum  | 25,746,205 | 39.7           | 193,126,055 |
| OvC_3          | OvC         | 3' V2       | 5,450 | Tumour      | Peritoneum  | 26,667,830 | 81.1           | 306,251,034 |
| OvC_4          | OvC         | 3' V2       | 6,257 | Tumour      | Peritoneum  | 44,446,808 | 63.0           | 298,554,807 |
| OvC_5          | OvC         | 3' V2       | 1,136 | Tumour      | Ovarium     | 5,213,201  | 87.5           | 146,559,477 |
| OvC_5          | OvC         | 3' V2       | 4,865 | Normal      | Ovarium     | 19,384,194 | 67.5           | 120,336,815 |
| CRC_1          | CRC         | 3' V2       | 2,712 | Tumour      | Core        | 23,040,771 | 74.1           | 267,375,232 |
| CRC_1          | CRC         | 3' V2       | 2,901 | Tumour      | Border      | 26,281,216 | 72.2           | 275,655,234 |
| CRC_1          | CRC         | 3' V2       | 2,666 | Normal      | na          | 22,077,384 | 67.6           | 161,020,595 |
| CRC_2          | CRC         | 3' V2       | 4,936 | Tumour      | Core        | 23,780,187 | 76.5           | 266,870,550 |
| CRC_2          | CRC         | 3' V2       | 4,461 | Tumour      | Border      | 20,942,817 | 79.5           | 255,400,094 |
| CRC_2          | CRC         | 3' V2       | 2,478 | Normal      | na          | 20,498,399 | 67.8           | 149,987,327 |
| CRC_3          | CRC         | 3' V2       | 2,871 | Tumour      | Core        | 21,895,911 | 68.5           | 173,029,484 |
| CRC_3          | CRC         | 3' V2       | 2,323 | Tumour      | Border      | 16,041,374 | 72.5           | 148,821,159 |
| CRC_3          | CRC         | 3' V2       | 1,904 | Normal      | na          | 8,600,112  | 77.6           | 126,457,430 |
| CRC_4          | CRC         | 3' V2       | 3,770 | Tumour      | Core        | 16,529,472 | 55.0           | 200,491,544 |
| CRC_4          | CRC         | 3' V2       | 2,271 | Tumour      | Border      | 13,847,003 | 56.1           | 158,677,458 |
| CRC_4          | CRC         | 3' V2       | 1,997 | Normal      | na          | 12,355,632 | 64.4           | 163,981,182 |
| CRC_5          | CRC         | 3' V2       | 709   | Tumour      | Core        | 2,362,128  | 83.6           | 73,852,856  |
| CRC_5          | CRC         | 3' V2       | 621   | Tumour      | Border      | 2,802,982  | 64.7           | 69,557,278  |
| CRC_5          | CRC         | 3' V2       | 1,261 | Normal      | na          | 4,250,554  | 77.0           | 102,694,399 |
| CRC_6          | CRC         | 3' V2       | 530   | Tumour      | Core        | 1,280,817  | 69.5           | 60,655,914  |
| CRC_6          | CRC         | 3' V2       | 720   | Tumour      | Border      | 3,609,540  | 54.5           | 97,567,804  |
| CRC_6          | CRC         | 3' V2       | 1,119 | Normal      | na          | 4,621,711  | 65.4           | 119,764,778 |
| CRC_7          | CRC         | 3' V2       | 747   | Tumour      | Core        | 5,046,944  | 46.9           | 75,192,324  |
| CRC_7          | CRC         | 3' V2       | 1,054 | Tumour      | Border      | 8,723,525  | 51.5           | 96,220,238  |
| CRC_7          | CRC         | 3' V2       | 2,633 | Normal      | na          | 14,030,213 | 67.8           | 179,638,932 |
| BC_1           | BC          | 5' V2       | 3,921 | Tumour      | Biopsy      | 23,817,225 | 83.4           | 331,894,515 |
| BC_2           | BC          | 5' V2       | 4,876 | Tumour      | Biopsy      | 16,583,928 | 65.8           | 162,530,552 |
| BC_3           | BC          | 5' V2       | 4,251 | Tumour      | Biopsy      | 20,633,409 | 85.6           | 309,676,287 |
| BC_4           | BC          | 5' V2       | 3,558 | Tumour      | Biopsy      | 13,810,634 | 72.7           | 154,003,539 |
| BC_5           | BC          | 5' V2       | 4,472 | Tumour      | Biopsy      | 22,094,301 | 65.8           | 150,279,221 |
| BC_6           | BC          | 5' V2       | 201   | Tumour      | Biopsy      | 1,310,634  | 83.0           | 39,183,120  |
| BC_7           | BC          | 5' V2       | 1,719 | Tumour      | Biopsy      | 15,089,867 | 71.4           | 146,585,647 |
| BC_8           | BC          | 5' V2       | 2,427 | Tumour      | Biopsy      | 9,087,189  | 69.3           | 151,070,133 |
| BC_9           | BC          | 5' V2       | 4,616 | Tumour      | Biopsy      | 28,428,991 | 66.8           | 265,636,248 |
| BC_10          | BC          | 5' V2       | 902   | Tumour      | Biopsy      | 4,088,085  | 76.3           | 39,349,726  |
| BC_11          | BC          | 5' V2       | 4,862 | Tumour      | Biopsy      | 28,400,652 | 65.9           | 275,631,788 |
| BC_12          | BC          | 5' V2       | 362   | Tumour      | Biopsy      | 1,725,747  | 81.3           | 24,816,828  |
| BC_12          | BC          | 3' V2       | 64    | Tumour      | Biopsy      | 323,793    | 93.5           | 15,193,301  |
| BC_12          | BC          | 3' V2       | 1,372 | Tumour      | Biopsy      | 8,866,716  | 77.5           | 118,432,604 |
| BC_13          | BC          | 5' V2       | 3,641 | Tumour      | Biopsy      | 19,494,370 | 70.3           | 219,414,682 |
| BC_14          | BC          | 5' V2       | 4,216 | Tumour      | Biopsy      | 34,749,191 | 65.8           | 284,244,840 |
| BC_15          | BC          | 3' V2       | 4,143 | Tumour      | Biopsy      | 20,268,164 | 56.9           | 295,259,214 |
| BC_15          | BC          | 3' V2       | 347   | Tumour      | Biopsy      | 2,851,324  | 55.9           | 157,883,076 |
| BC_16          | BC          | 3' V2       | 269   | Tumour      | Biopsy      | 1,070,916  | 67.4           | 195,421,321 |

**Supplementary Table S2:** Sequencing metrics of the samples included in this study. Cancer types are lung cancer (LC), colorectal cancer (CRC), ovarian cancer (OvC) and breast cancer (BC). Single cell suspensions were converted to single cell RNA sequencing libraries using 10X genomics kits with 3' V1 3' V2 or 5' V2 chemistry; UMI: unique molecular identifier, equivalent to a unique detected transcript; sequencing saturation and total number of sequenced reads.
